# Supplementary material for: Childhood socioeconomic position and adult leisure-time physical activity: a systematic review
Source: PubMed Central journal article supplement (PMC4501082; doi:10.1186/s12966-015-0250-0), 2015-07-03
Supplement: 12966_2015_250_MOESM1_ESM.pdf [file 12966_2015_250_MOESM1_ESM.pdf]

**Additional file 1a** OvidSP (Embase, Medline and PsycINFO) search strategy.

---

**Search Terms**

---

1. (physical\* activ\*)
  2. (leisure adj3 time)
  3. (sport\*)
  4. (exercise)
  5. (walk\*)
  6. (recreational)
  7. (father\* adj3 (occupation\* or education\*))
  8. (mother\* adj3 (occupation\* or education\*))
  9. (parent\* adj3 (occupation\* or education\*))
  10. (father\* adj3 (income or manual))
  11. (mother\* adj3 (income or manual))
  12. (parent\* adj3 (income or manual))
  13. (father\* adj3 (social class or social status))
  14. (mother\* adj3 (social class or social status))
  15. (parent\* adj3 (social class or social status))
  16. (child\* adj3 (social class or social status))
  17. (early-life adj3 (social class or social status))
  18. (adolescen\* adj3 (social class or social status))
  19. (father\* adj3 (socioeconomic or socio-economic))
  20. (mother\* adj3 (socioeconomic or socio-economic))
  21. (parent\* adj3 (socioeconomic or socio-economic))
  22. (child\* adj3 (socioeconomic or socio-economic))
  23. (adolescen\* adj3 (socioeconomic or socio-economic))
  24. (early adj3 (socioeconomic or socio-economic))
  25. (early-life adj3 (socioeconomic or socio-economic))
  26. (child\* adj3 (deprivation or poverty))
  27. (early-life adj3 (deprivation or poverty))
  28. (adolescen\* adj3 (deprivation or poverty))
  29. (child\* adj3 overcrowding)
  30. (adult\*)
  31. (midlife or mid-life)
  32. (old\*)
  33. (later-life)
  34. 1 OR 2 OR 3 OR 4 OR 5 OR 6
  35. 7 OR 8 OR 9 OR 10 OR 11 OR 12 OR 13 OR 14 OR 15 OR 16 OR 17 OR 18 OR 19 OR 20 OR 21 OR 22 OR 23 OR 24 OR 25 OR 26 OR 27 OR 28 OR 29
  36. 30 OR 31 OR 32 OR 33
  37. 34 AND 35 AND 36
  38. Limit 37 to humans
  39. Remove duplicates from 38
- 

Adj3 locates results where search terms are within three words of each other.

\* captures alternative word endings

**Additional file 1b** EBSCO (CINAHL and SPORTDiscus) search strategy.

---

**Search Terms**

---

1. (physical\* activ\*)
  2. (leisure N3 time)
  3. (sport\*)
  4. (exercise)
  5. (walk\*)
  6. (recreational)
  7. (father\* N3 (occupation\* or education\*))
  8. (mother\* N3 (occupation\* or education\*))
  9. (parent\* N3 (occupation\* or education\*))
  10. (father\* N3 (income or manual))
  11. (mother\* N3 (income or manual))
  12. (parent\* N3 (income or manual))
  13. (father\* N3 (social class or social status))
  14. (mother\* N3 (social class or social status))
  15. (parent\* N3 (social class or social status))
  16. (child\* N3 (social class or social status))
  17. (early-life N3 (social class or social status))
  18. (adolescen\* N3 (social class or social status))
  19. (father\* N3 (socioeconomic or socio-economic))
  20. (mother\* N3 (socioeconomic or socio-economic))
  21. (parent\* N3 (socioeconomic or socio-economic))
  22. (child\* N3 (socioeconomic or socio-economic))
  23. (adolescen\* N3 (socioeconomic or socio-economic))
  24. (early N3 (socioeconomic or socio-economic))
  25. (early-life N3 (socioeconomic or socio-economic))
  26. (child\* N3 (deprivation or poverty))
  27. (early-life N3 (deprivation or poverty))
  28. (adolescen\* N3 (deprivation or poverty))
  29. (child\* N3 overcrowding)
  30. (adult\*)
  31. (midlife or mid-life)
  32. (old\*)
  33. (later-life)
  34. 1 OR 2 OR 3 OR 4 OR 5 OR 6
  35. 7 OR 8 OR 9 OR 10 OR 11 OR 12 OR 13 OR 14 OR 15 OR 16 OR 17 OR 18  
OR 19 OR 20 OR 21 OR 22 OR 23 OR 24 OR 25 OR 26 OR 27 OR 28 OR 29
  36. 30 OR 31 OR 32 OR 33
  37. 34 AND 35 AND 36
  38. Remove duplicates from 37
- 

N3 locates results where search terms are within three words of each other.

\* captures alternative word endings
