# Supplementary material for: Childhood socioeconomic position and adult leisure-time physical activity: a systematic review
Source: PubMed Central journal article supplement (PMC4501082; doi:10.1186/s12966-015-0250-0), 2015-07-03
Supplement: 12966_2015_250_MOESM2_ESM.pdf [file 12966_2015_250_MOESM2_ESM.pdf]

**Additional file 2** Data extraction form.

|                                                              |                    |                                                                      |                      |                 |                     |
|--------------------------------------------------------------|--------------------|----------------------------------------------------------------------|----------------------|-----------------|---------------------|
| <b>A. Reference details</b>                                  |                    |                                                                      |                      |                 |                     |
| A1. Ref ID, 1 <sup>st</sup> author, title, publication year, |                    |                                                                      |                      |                 |                     |
| A2. Assessor's name and date of assessment                   |                    |                                                                      |                      |                 |                     |
| <b>B. Study details</b>                                      |                    |                                                                      |                      |                 |                     |
| B1. Name of study/cohort                                     |                    |                                                                      |                      |                 |                     |
| B2. Design                                                   | Prospective cohort |                                                                      | Retrospective cohort |                 | Case-control        |
| B2A. If other:                                               |                    |                                                                      |                      |                 |                     |
| B3. Country, setting                                         |                    |                                                                      |                      |                 |                     |
| <b>C. Childhood socioeconomic position</b>                   |                    |                                                                      |                      |                 |                     |
| C1. Parental occupation                                      | Yes                |                                                                      |                      |                 | No                  |
| C2. Parental education                                       | Yes                |                                                                      |                      |                 | No                  |
| C3. Other measures (list):                                   |                    |                                                                      |                      |                 |                     |
| C4. How ascertained                                          | Prospectively      |                                                                      |                      |                 | Retrospectively     |
| C5. Age recorded                                             |                    |                                                                      |                      |                 |                     |
| C6. Age referred to                                          |                    |                                                                      |                      |                 |                     |
| <b>D. Physical activity (PA) outcomes</b>                    |                    |                                                                      |                      |                 |                     |
| D1. Parameters measured                                      | Frequency          |                                                                      | Type                 |                 | Duration            |
| D2. Type of leisure-time PA (LTPA) measured                  | Sport/exercise     |                                                                      | Gardening/DIY        |                 | Total LTPA          |
| D2A. If other please describe                                |                    |                                                                      |                      |                 |                     |
| D3. How ascertained                                          | Self-reported      |                                                                      |                      |                 | Objective methods   |
| D4. Age ascertained                                          |                    |                                                                      |                      |                 |                     |
| D5. Variable details                                         | Binary             |                                                                      | Ordinal              |                 | Continuous          |
| D5A. If other:                                               |                    |                                                                      |                      |                 |                     |
| <b>E. Available participant numbers</b>                      |                    |                                                                      |                      |                 |                     |
| E1. Baseline                                                 | Yes                |                                                                      | No                   |                 | If yes, number      |
| E2. Excluded                                                 | Yes                |                                                                      | No                   |                 | If yes, number      |
| E3. Refused                                                  | Yes                |                                                                      | No                   |                 | If yes, number      |
| E4. Lost to follow-up                                        | Yes                |                                                                      | No                   |                 | If yes, number      |
| E5. Other losses                                             | Yes                |                                                                      | No                   |                 | If yes, number      |
| E6. Included in analysis                                     | Yes                |                                                                      | No                   |                 | If yes, number      |
| E7. All accounted for                                        | Yes                |                                                                      | No                   |                 |                     |
| <b>F. Analysis</b>                                           |                    |                                                                      |                      |                 |                     |
| F1. How results analysed                                     | Descriptive/Trend  |                                                                      | Logistic regression  |                 | Linear regression   |
| F1A. If other:                                               |                    |                                                                      |                      |                 |                     |
| F2. Included in analysis                                     | Men and women      |                                                                      | Men only             |                 | Women only          |
| F3. Only significant results presented                       | Yes                |                                                                      |                      |                 | No                  |
| <b>G. Summary of results</b>                                 |                    |                                                                      |                      |                 |                     |
| G1. Prevalence/Mean difference                               | Yes                |                                                                      |                      |                 | No                  |
| G2. Odds/Risk ratios                                         | Yes                |                                                                      |                      |                 | No                  |
| G3. Regression coefficients                                  | Yes                |                                                                      |                      |                 | No                  |
| G4. Confidence intervals (CIs)/ P-value/standard errors (SE) | Yes                |                                                                      |                      |                 | No                  |
| G5. Other                                                    | Yes                |                                                                      |                      |                 | No                  |
| G5A. If other:                                               |                    |                                                                      |                      |                 |                     |
| <b>H. References for screening</b>                           |                    |                                                                      |                      |                 |                     |
| H1. Reference numbers                                        |                    |                                                                      |                      |                 |                     |
| <b>I. Effect estimates</b>                                   |                    |                                                                      |                      |                 |                     |
| Association tested                                           | Number analysed    | Type of effect estimate and category comparison/value of unit change |                      | Effect estimate | 95% CI; SE; p-value |
| 1.                                                           |                    |                                                                      |                      |                 |                     |
| 2.                                                           |                    |                                                                      |                      |                 |                     |
