# Supplementary material for: Childhood socioeconomic position and adult leisure-time physical activity: a systematic review
Source: PubMed Central journal article supplement (PMC4501082; doi:10.1186/s12966-015-0250-0), 2015-07-03
Supplement: 12966_2015_250_MOESM3_ESM.pdf [file 12966_2015_250_MOESM3_ESM.pdf]

### **Additional file 3** Amended Newcastle-Ottawa Quality Assessment Scale.

Note: A study can be awarded a maximum of two stars for each numbered item – (except number 5).

#### **A. Selection**

##### 1) Representativeness of the exposed cohort

- a) Truly representative of the source population. ★ ★
- b) Somewhat representative of the source population. ★
- c) Selected group of users e.g. nurses, volunteers.
- d) No description of the derivation of the cohort.

##### 2) Ascertainment of childhood socioeconomic position (SEP)

- a) Prospectively from parents/participants when aged  $\leq 18$  years. ★ ★
- b) Retrospectively collected with attempts to reduce recall bias (e.g. life-grid and structured interview techniques). ★
- c) Retrospectively collected without attempts to reduce recall bias.
- d) No description.

#### **B. Comparability**

##### 3) Comparability of cohorts on the basis of the design/analysis

- a) Study controls for adult SEP. ★
- b) Study controls for any additional relevant factors (e.g. age, sex). ★
- c) Only unadjusted model presented.

#### **C. Outcome**

##### 4) Assessment of physical activity

- a) Objective methods (heart-rate monitoring/accelerometer). ★ ★
- b) Self-reported using validated questionnaire/diary/interview. ★
- c) Self-report.
- d) No description.

##### 5) Adequacy of cohort follow-up

- a) Complete follow up - all subjects accounted for. ★
- b) Subjects lost to follow up unlikely to introduce bias ( $\geq 75\%$  follow-up or description provided of those lost). ★
- c)  $< 75\%$  follow-up and no description of those lost.
- d) No statement.
